# Supplementary material for: Choice of 16S Ribosomal RNA Primers Impacts Male Urinary Microbiota Profiling
Source: PubMed Central journal article supplement (PMC9069555; doi:10.3389/fcimb.2022.862338), 2022-04-21
Supplement: DataSheet_1.pdf [file DataSheet_1.pdf]

# Supplementary Material

## 1. Supplementary Figures and Tables

### 1.1. Supplementary Figures

A high-quality copy of all supplementary figures are available as separate files.

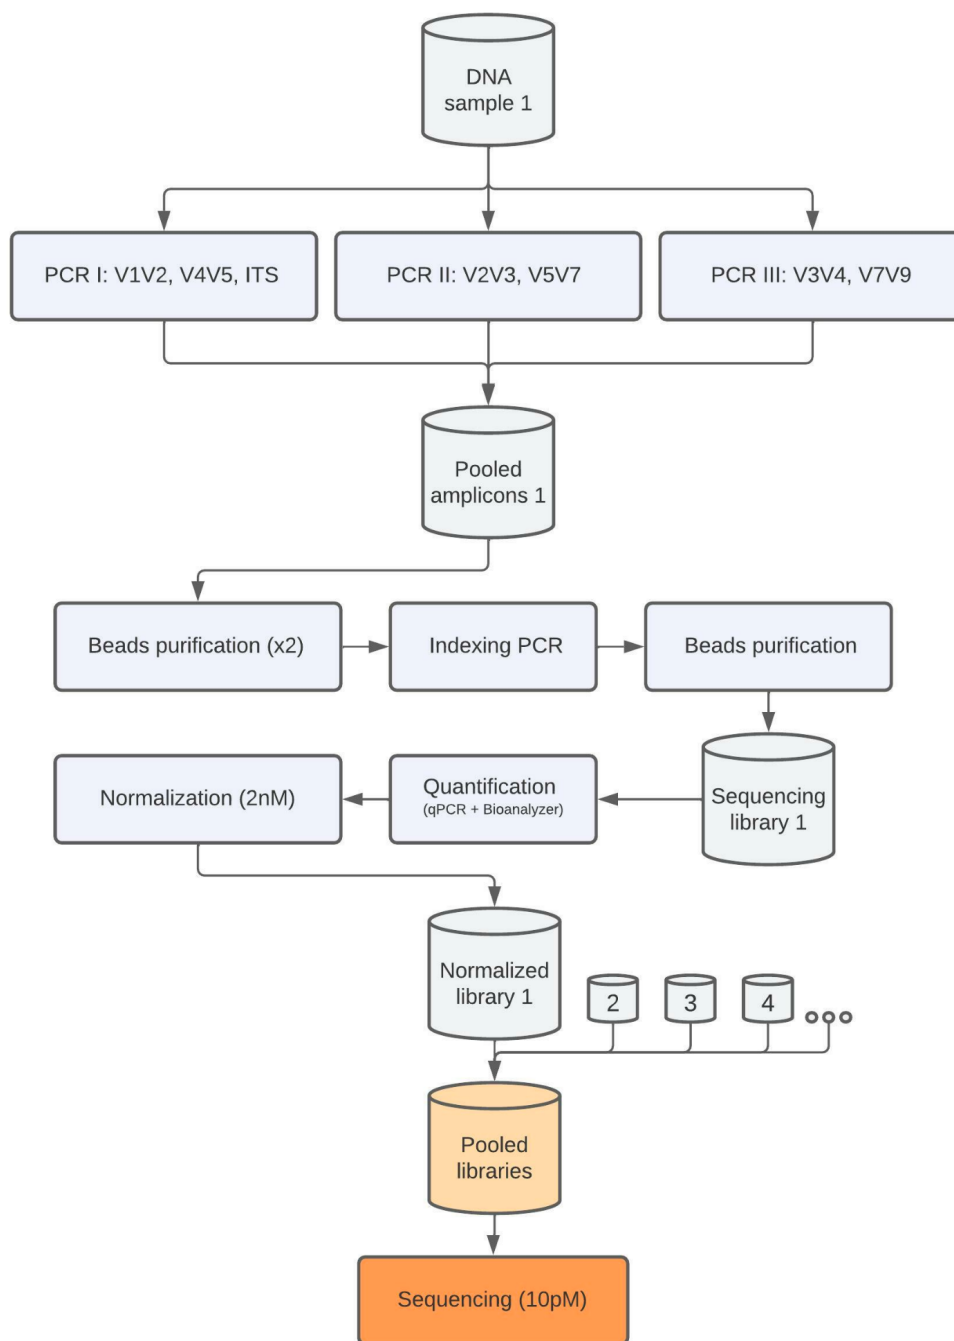

**Supplementary Figure 1: Flowchart of key methods during sequencing libraries preparation.**

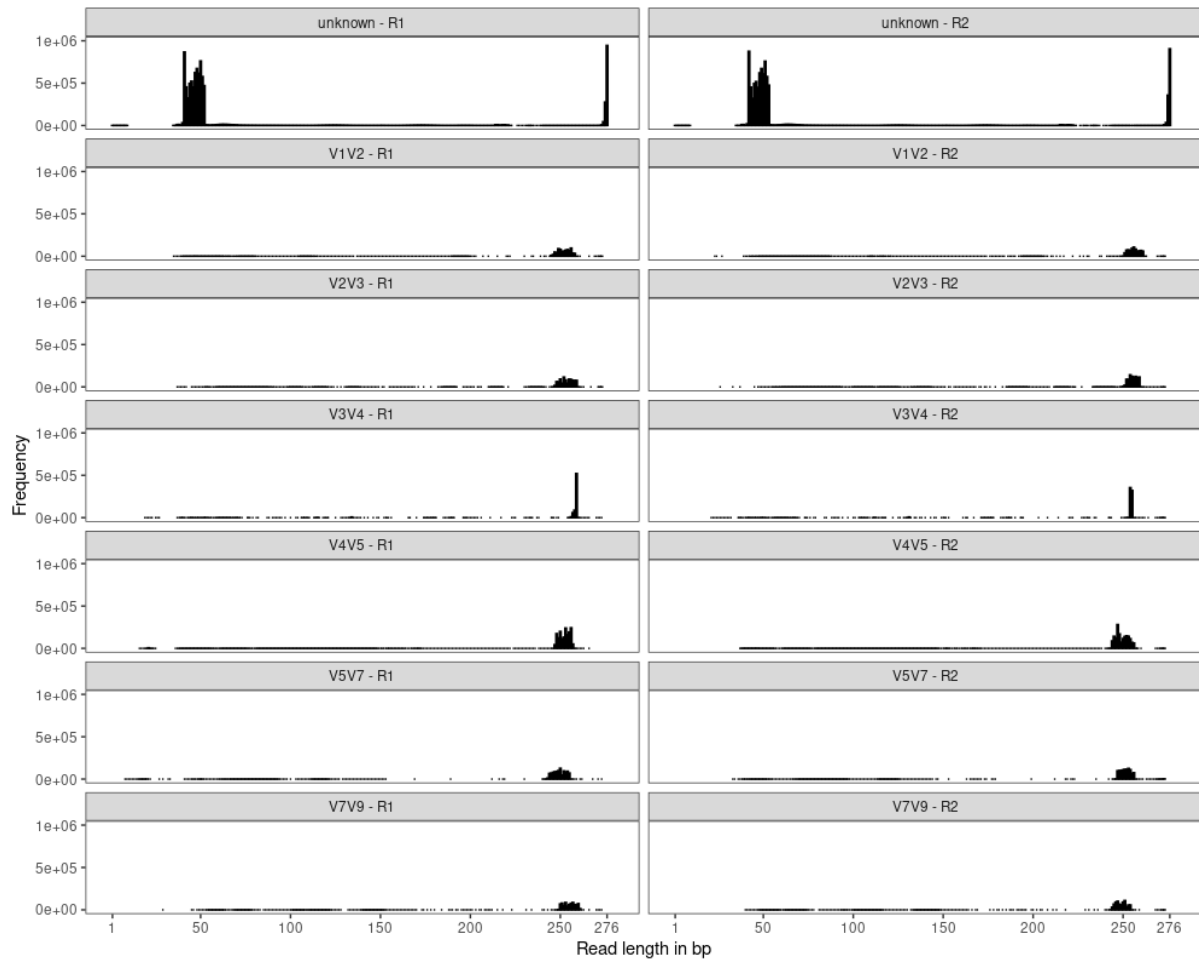

**Supplementary Figure 2: Read lengths for each 16S rRNA amplicon-specific dataset.** Histograms with distribution of read lengths in bp. Read lengths for sequences not associated with any of the amplicons of interest (unknown) are also shown. R1, forward reads; R2, reverse reads.

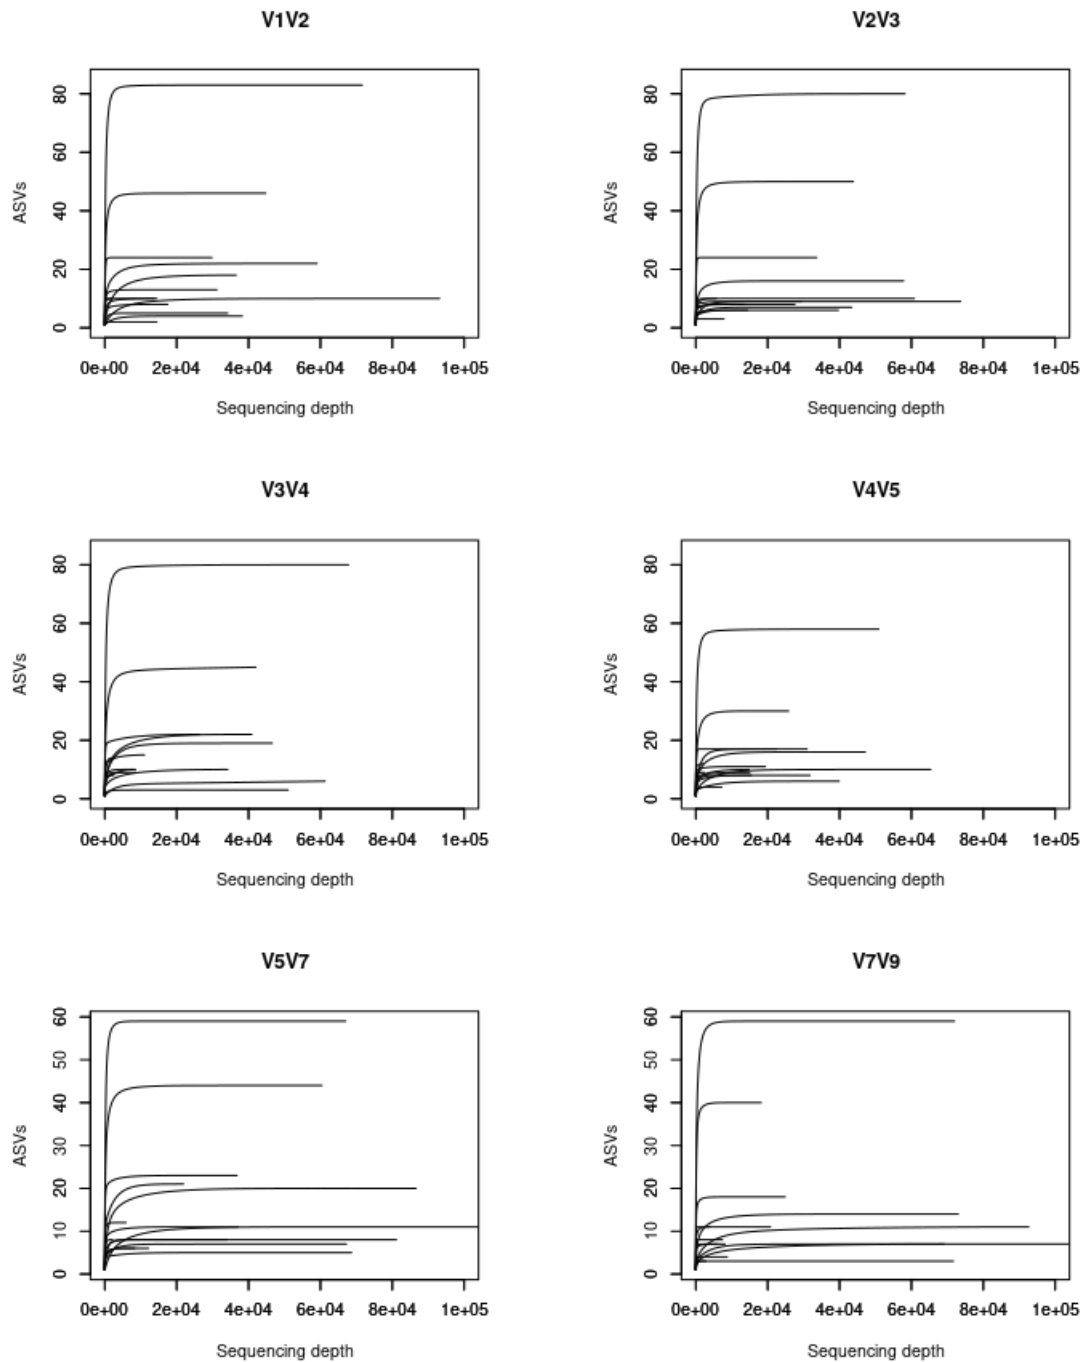

**Supplementary Figure 3: Amplicon sequence variants (ASVs) rarefaction curves for each 16S rRNA amplicon-specific dataset.** Each curve depicts a library. Reads were selected by random subsampling without replacement at incremental steps of 50 reads. Plots were truncated at sequencing depth equals 100,000 reads.

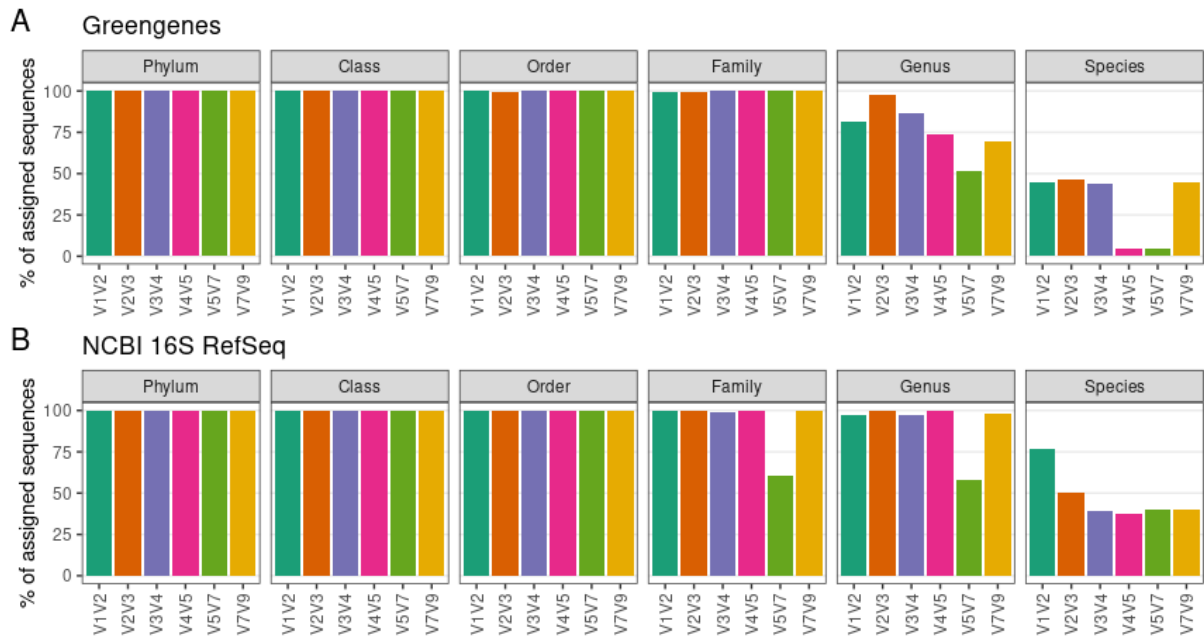

**Supplementary Figure 4: Taxonomic resolution for each 16S rRNA amplicon-specific dataset.** (A) Percentage of sequences with assigned taxonomy (per taxonomic level) for each amplicon-specific dataset when using Greengenes as reference database. (B) Percentage of sequences with assigned taxonomy (per taxonomic level) for each amplicon-specific dataset when using NCBI 16S RefSeq as reference database.

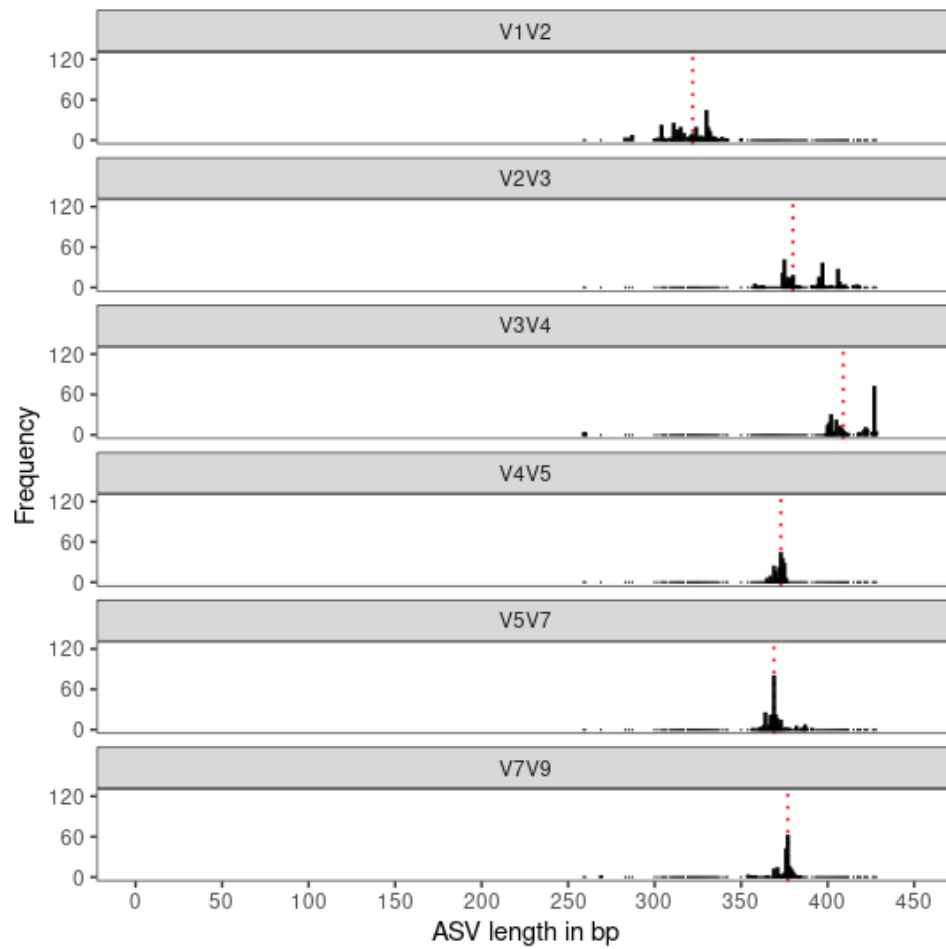

**Supplementary Figure 5: Amplicon sequence variant (ASV) lengths for each 16S rRNA amplicon-specific dataset.** Histograms with distribution of ASV lengths in bp. The median ASV size per amplicon-specific dataset is indicated by a red dotted line.

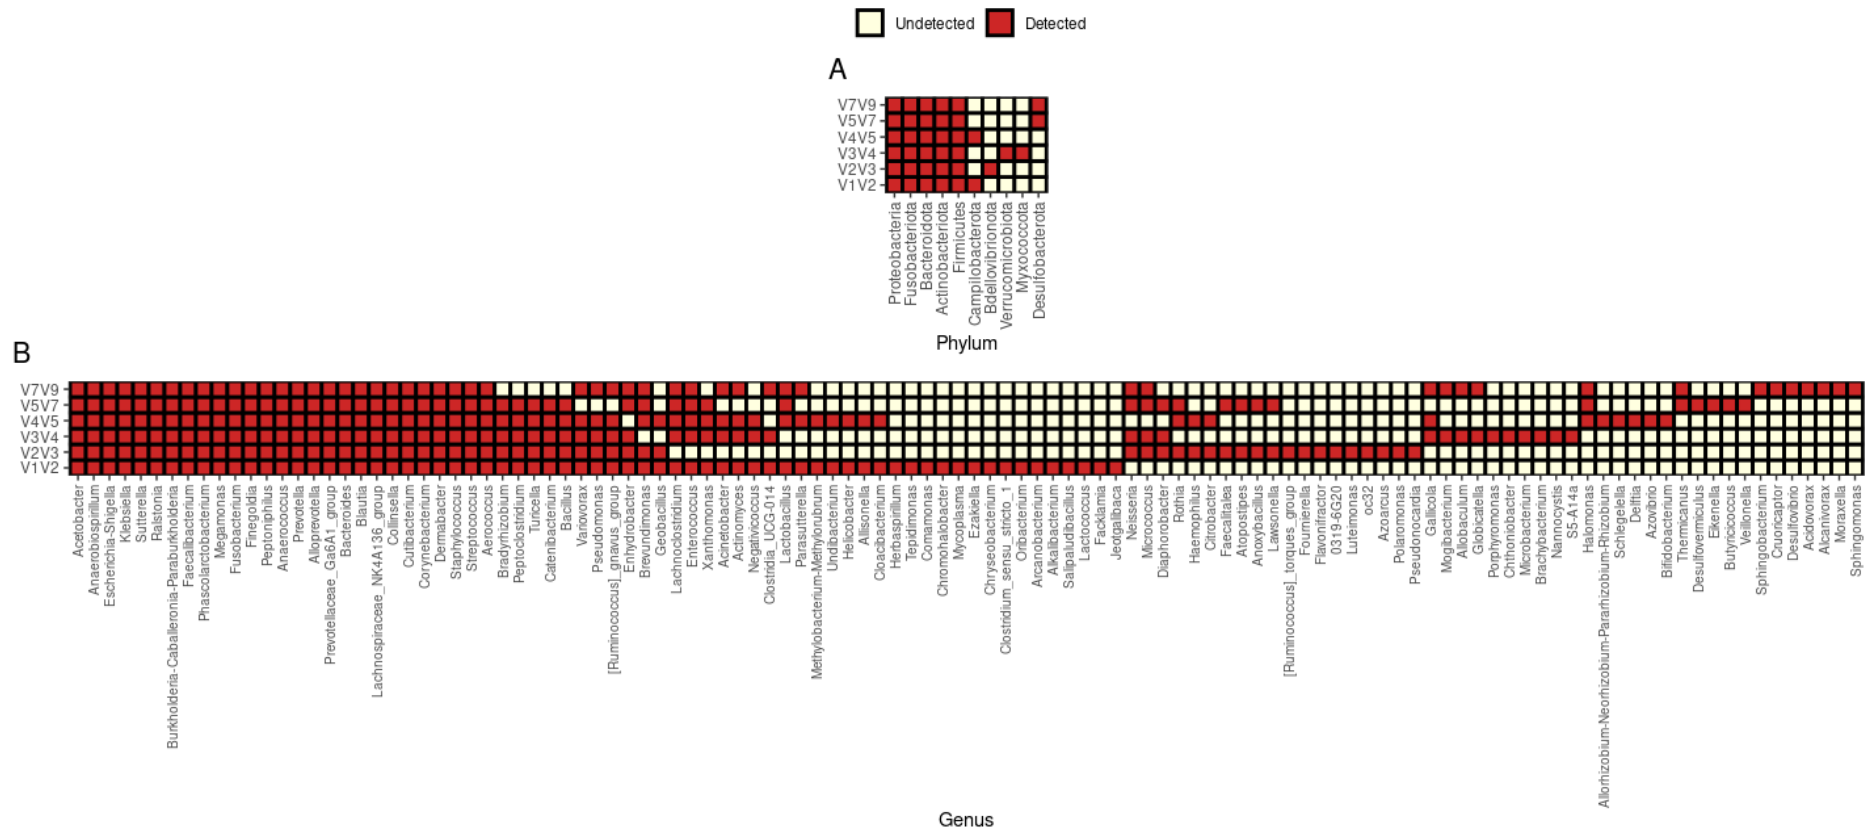

**Supplementary Figure 6: Phyla and genera detected in each 16S rRNA amplicon-specific dataset.** (A) Heatmap depicting the phyla detected in each amplicon-specific dataset. (B) Heatmap depicting the genera detected in each amplicon-specific dataset. Taxa are sorted based on the number of amplicon-specific datasets in which they were detected.

V1V2

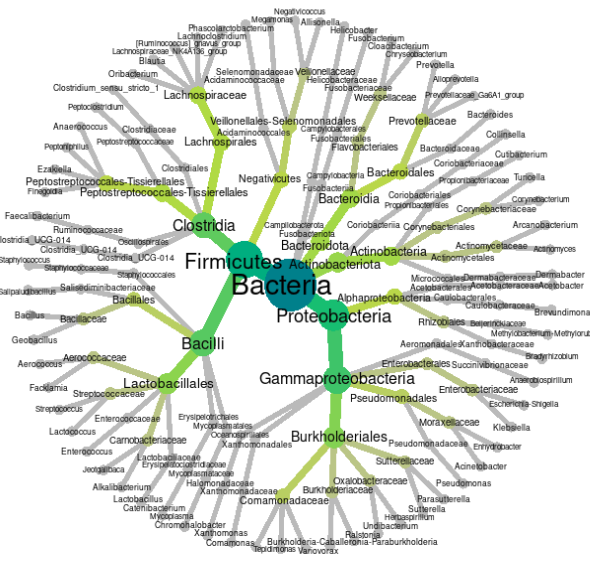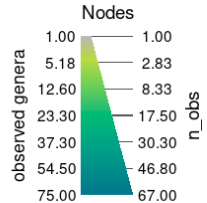

V2V3

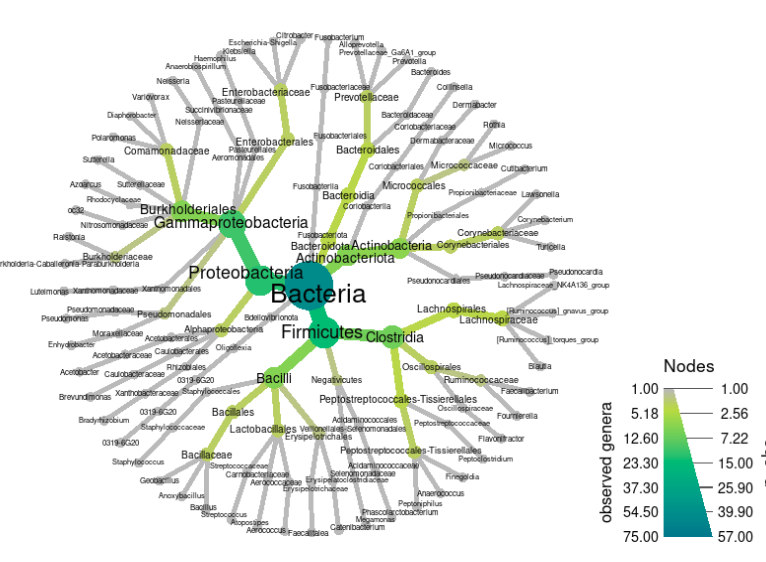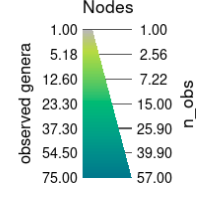

V3V4

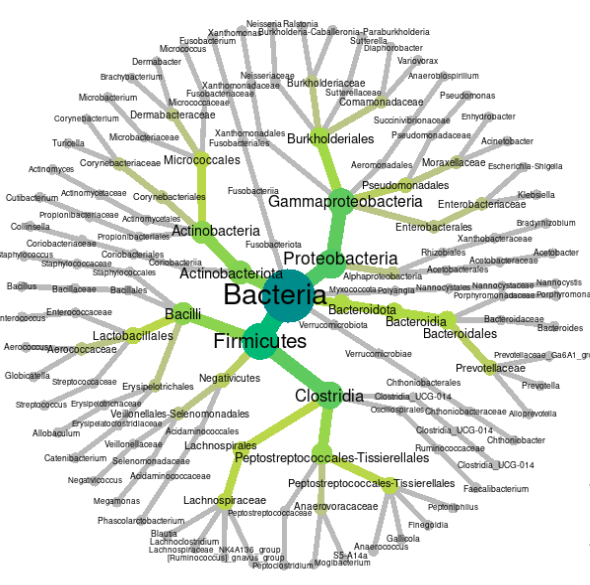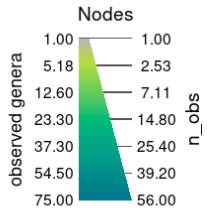

V4V5

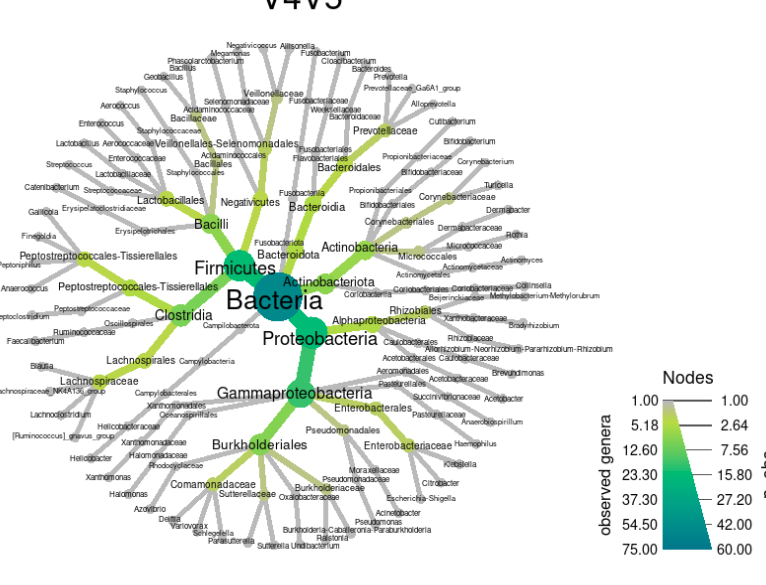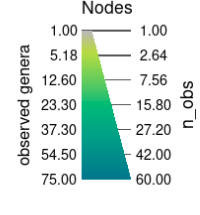

V5V7

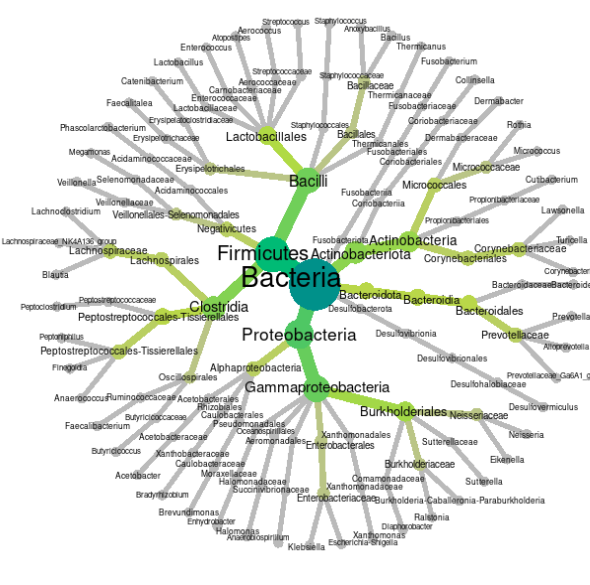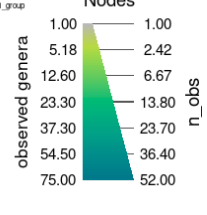

V7V9

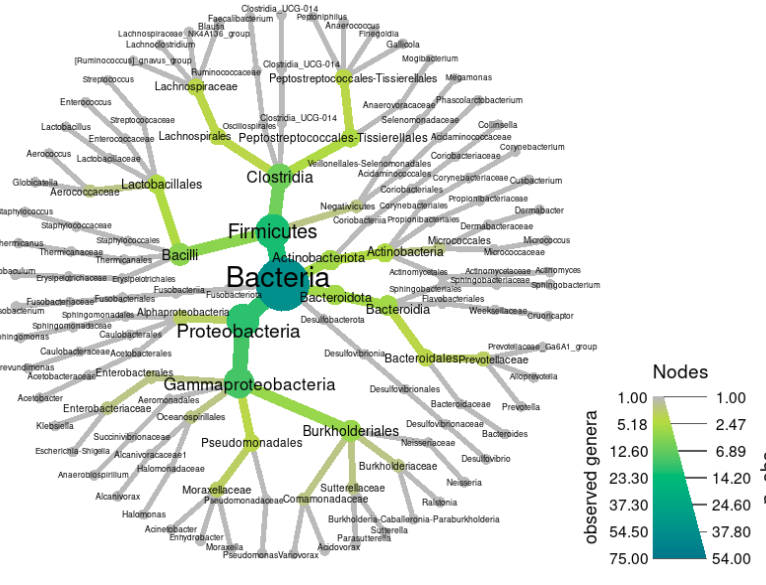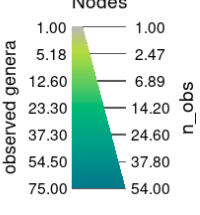

**Supplementary Figure 7: Taxonomic tree of each 16S rRNA amplicon-specific dataset.** Taxa detected in each amplicon-specific dataset are shown up to genus level (tree leaves). Node sizes and color scheme represent the number of leaves (number of genera) present in the subtree of the nodes. The Reingold-Tilford layout was used.



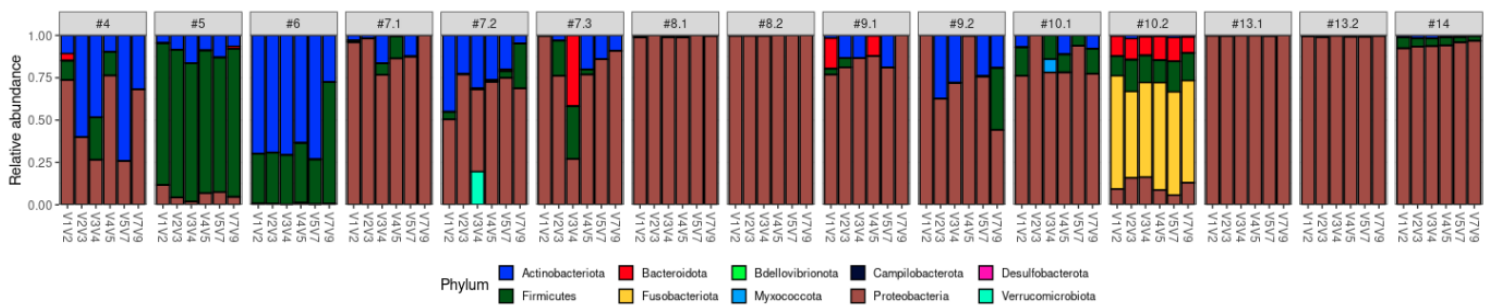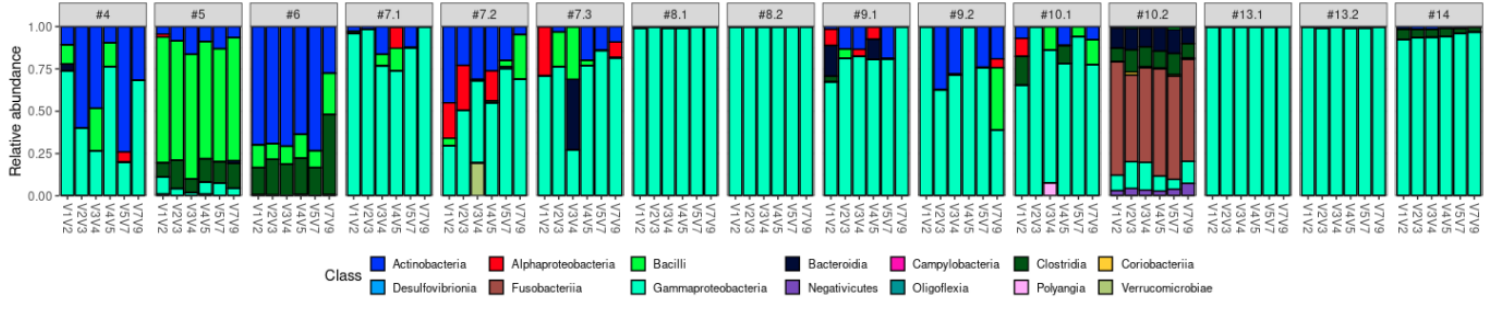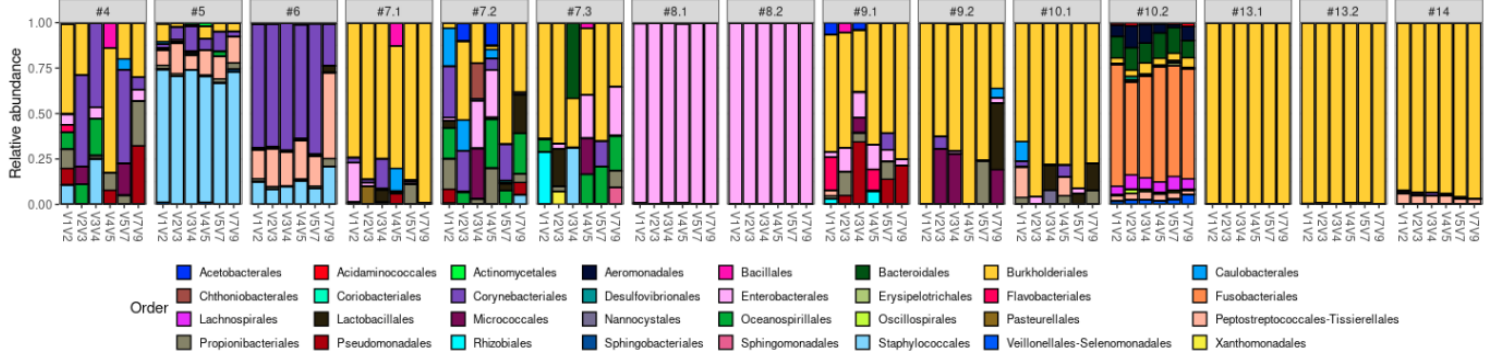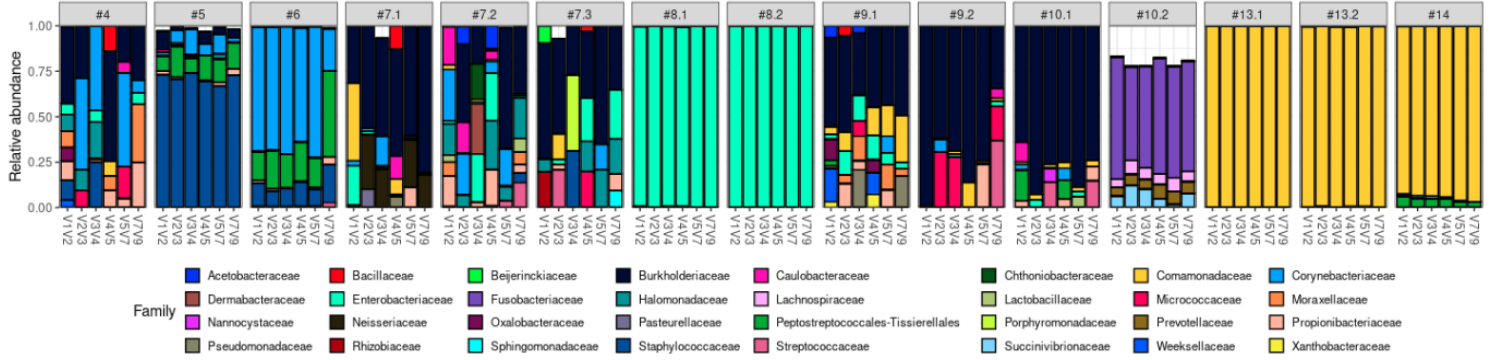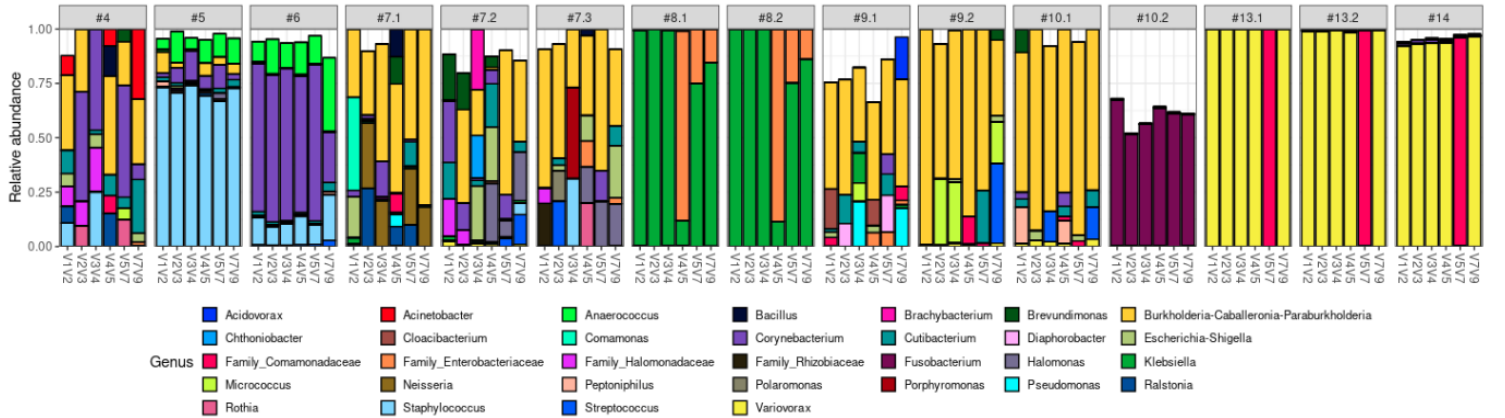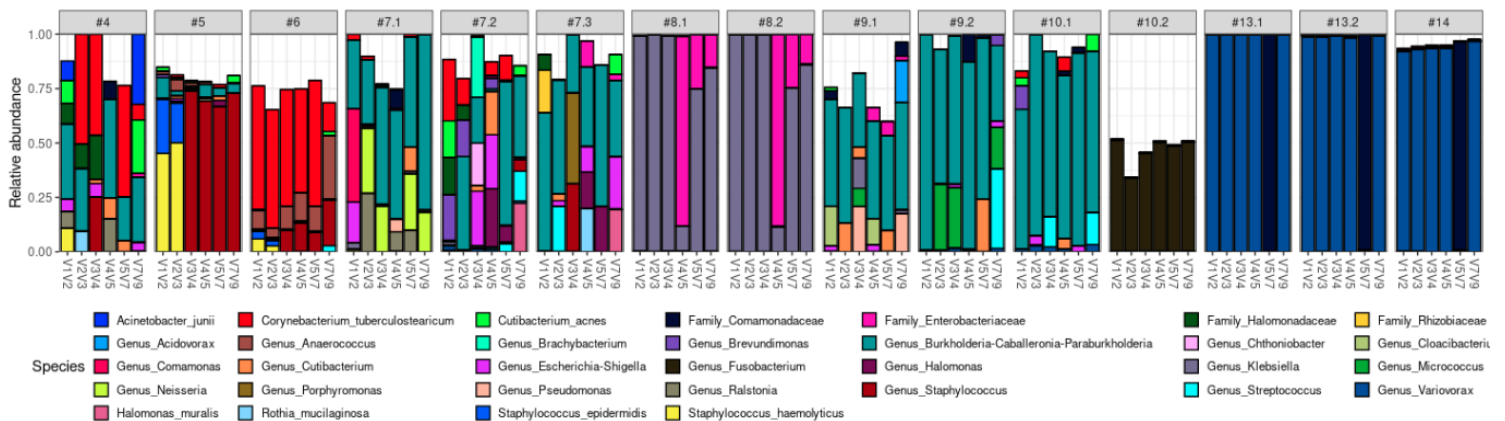

**Supplementary Figure 8: Taxa (phylum to species level) relative abundances for each library as profiled by different 16S rRNA amplicons. Only the 32 most abundant taxa are shown (based on minimum relative abundance in at least one sample).**

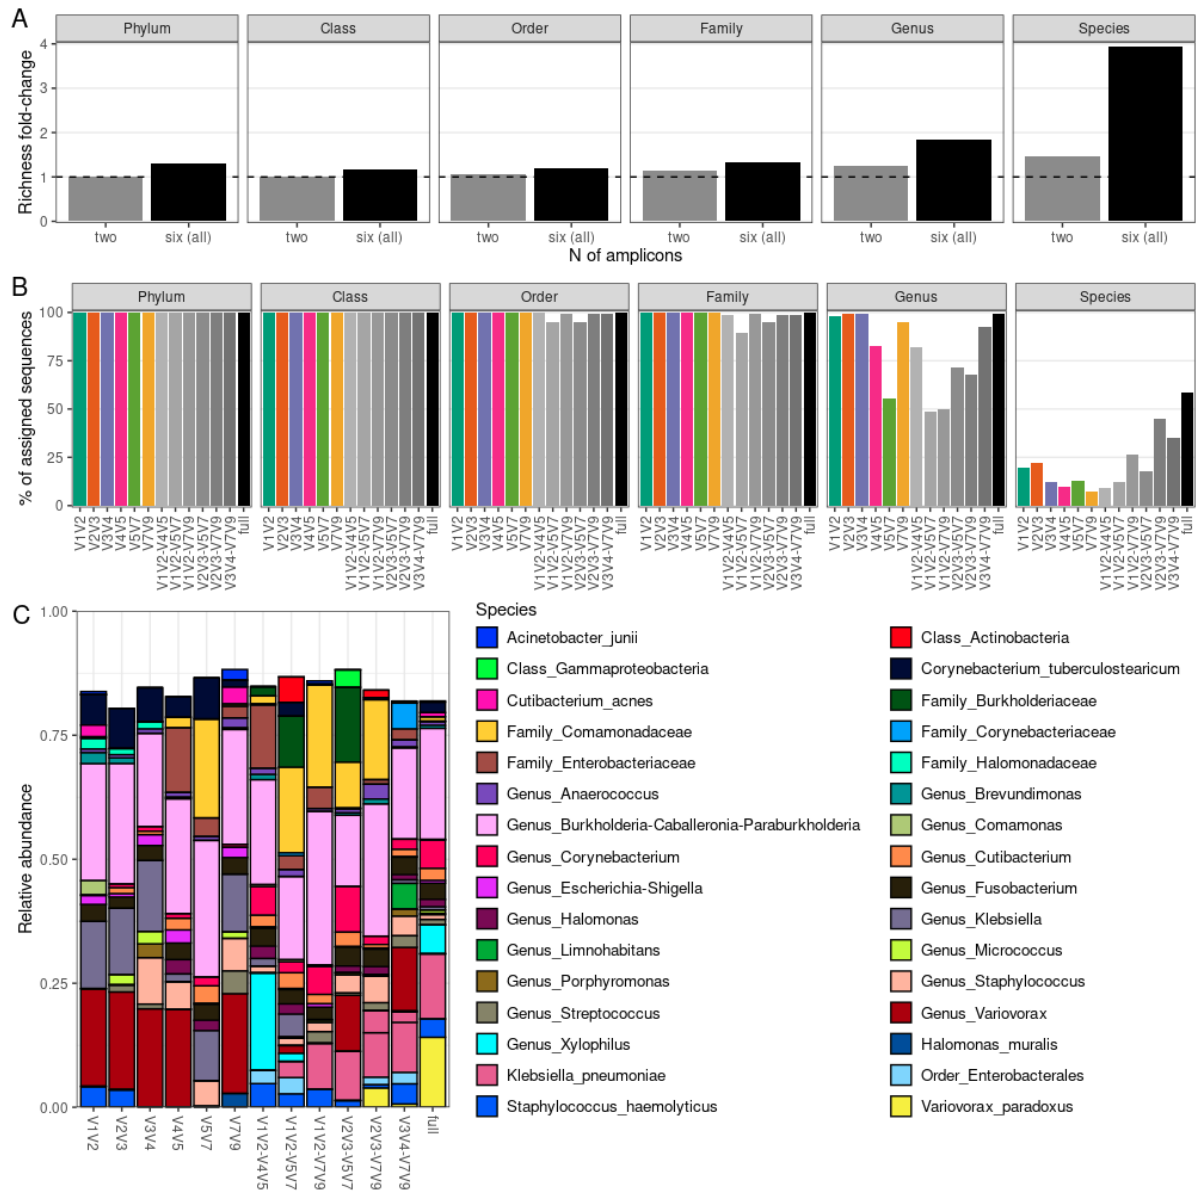

**Supplementary Figure 9: Richness and taxonomic composition of Sidle-reconstructed datasets.** (A) Fold-increase in taxonomic richness of combinations of two (averaged over all pairs) or six amplicons (as built with Sidle) in comparison with the average taxonomic richness found across amplicon-specific datasets. (B) Percentage of sequences with assigned taxonomy (per taxonomic level) for each amplicon-specific or Sidle-reconstructed dataset (C) Average species relative abundance per amplicon-specific or Sidle-reconstructed dataset. **Only the 32 most abundant species are shown (based on minimum relative abundance in at least one sample, which is adjusted for each plot).**

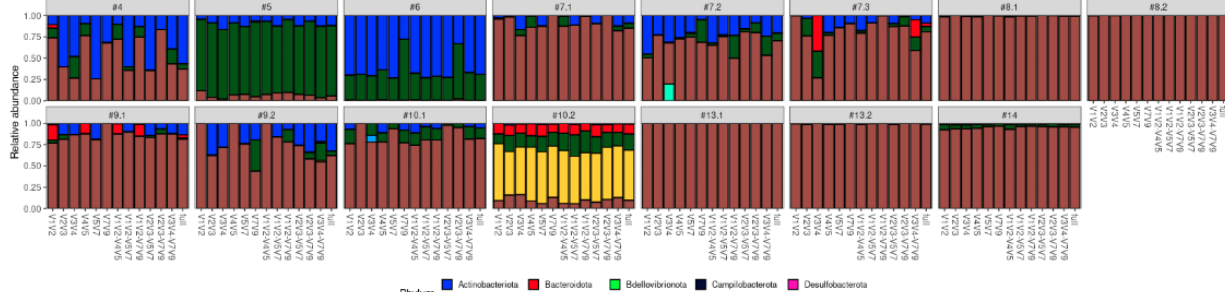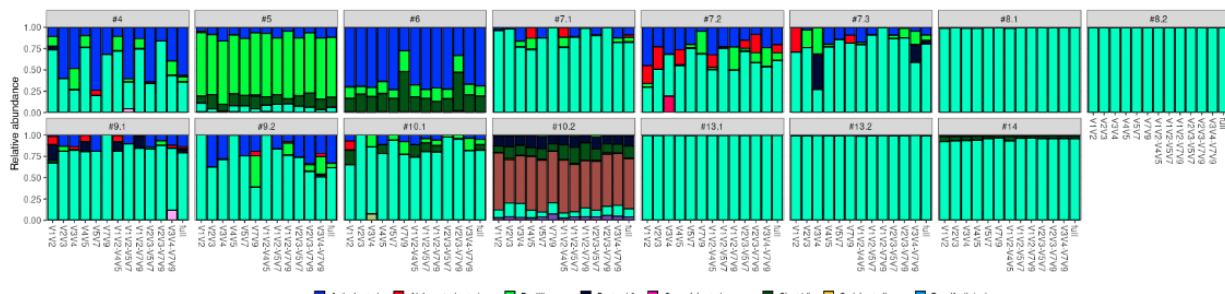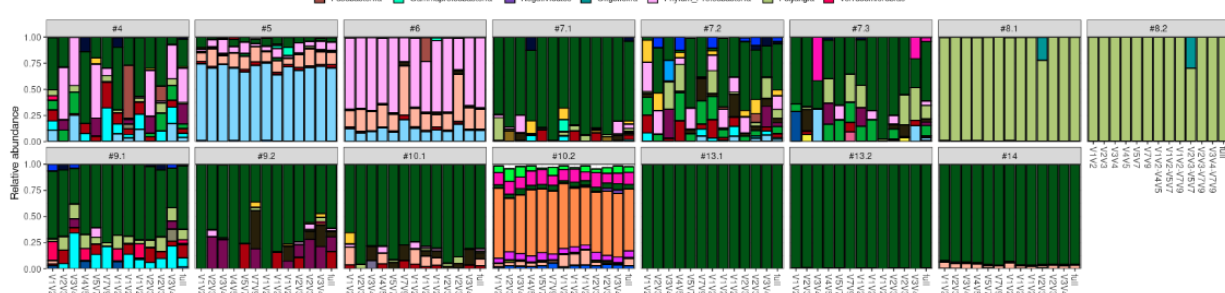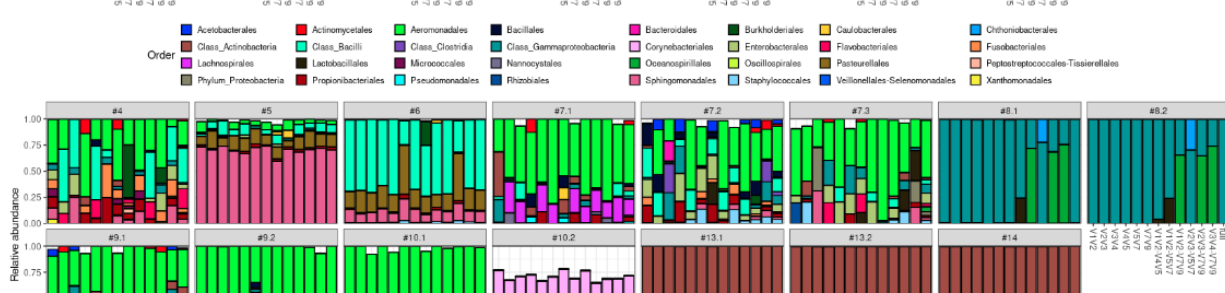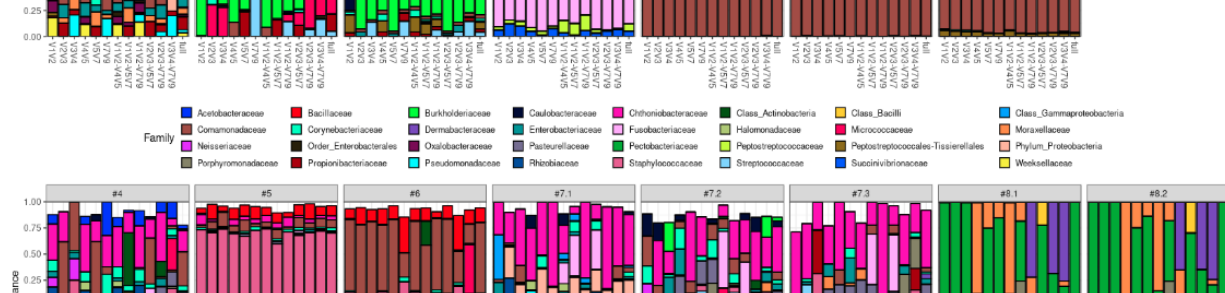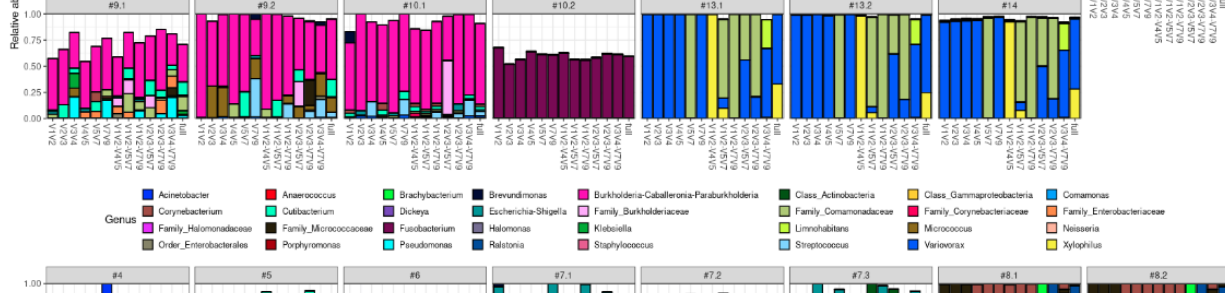

**Supplementary Figure 10: Taxa (phylum to species level) relative abundances for each library as profiled by different 16S rRNA amplicons and Sidle-reconstructed combinations. Only the 32 most abundant taxa are shown (based on minimum relative abundance in at least one sample).**

## 1.2. Supplementary Tables

| Patient | Condition | Samples          |
|---------|-----------|------------------|
| #1      | BPH       | #1               |
| #2      | BPH       | #2               |
| #3      | BPH       | #3               |
| #4      | BPH       | #4               |
| #5      | BPH       | #5               |
| #6      | BPH       | #6               |
| #7      | NMIBC     | #7.1, #7.2, #7.3 |
| #8      | NMIBC     | #8.1, #8.2       |
| #9      | NMIBC     | #9.1, #9.2       |
| #10     | NMIBC     | #10.1, #10.2     |
| #11     | NMIBC     | #11.1*, #11.2*   |
| #12     | NMIBC     | #12.1*, #12.2*   |
| #13     | NMIBC     | #13.1, #13.2     |
| #14     | BPH       | #14              |
| SC      | -         | #15              |
| NC      | -         | #16              |

**Supplementary Table 1: Patients and samples included in the study.** Samples not sequenced due to low target sequence concentration are indicated with an asterisk. NMIBC patients had two or three samples collected longitudinally during the treatment course. BPH, benign prostatic hyperplasia; NMIBC, non-muscle invasive bladder cancer; SC, Smart Control; NC, DNA extraction negative control.

| <b>Amplicon</b> | <b>Primers F</b>       | <b>Primers R</b>       | <b>Length (F/R)</b> | <b>%GC (F/R)</b> | <b>DI (F/R)</b> | <b>Names (F/R)</b> | <b>Amplicon length</b> |
|-----------------|------------------------|------------------------|---------------------|------------------|-----------------|--------------------|------------------------|
| ITS             | CTTGGTCATTTAGAGGAAGTAA | GCTGCGTTCTTCATCGATGC   | 22/20               | 36/55            | 0/0             | ITS1F/ITS2         | 230                    |
| V1V2            | AGRGTTTGATYMTGGCTC     | CTGCTGCCTYCCGTA        | 18/15               | 39-56/60-67      | 3/1             | 27F/357R           | 330                    |
| V2V3            | GGCGNACGGGTGAGTAA      | WTTACCGCGGCTGCTGG      | 17/17               | 59-65/65         | 3/1             | 104F/518R          | 414                    |
| V3V4            | CCTACGGGNGGCWGCAG      | GACTACHVGGGTATCTAATCC  | 17/21               | 71-76/43-52      | 4/4             | 341F/805R          | 464                    |
| V4V5            | GTGYCAGCMGCCGCGGTAA    | CCGYCAATTYMTTTRAGTT    | 19/19               | 63-74/26-47      | 2/4             | 515F/926R          | 411                    |
| V5V7            | GGATTAGATACCCBRGTAGTC  | ACGTCRTCCDCCTTCCTC     | 21/20               | 43-52/60-70      | 3/3             | 785F/1175R         | 390                    |
| V7V9            | YAACGAGCGMRACCC        | TACGGYTACCTTGTTAYGACTT | 15/22               | 53-73/36-45      | 3/2             | 1115F/1492R        | 377                    |

**Supplementary Table 2: List of primers used in the first-round of PCR.** The GC content percentage (%GC) is shown as a range when primers contain degenerate bases. The degeneracy index (DI) of each primer is calculated as the sum of the number of alternate base-pairings for each degenerate base. F, forward primers; R, reverse primers.

| Dataset | Total reads | Median length (F/R) | 25th Q (F/R) | 50th Q (F/R) | 75th Q (F/R) | Q-filtered | Denoised  | Merged    | Non chimeras I | Non chimeras II | Bacterial | Non contaminants | % Total reads decrease | Median ASV length |
|---------|-------------|---------------------|--------------|--------------|--------------|------------|-----------|-----------|----------------|-----------------|-----------|------------------|------------------------|-------------------|
| V1V2    | 750,924     | 252/256             | 36/17        | 38/25        | 38/32        | 694,464    | 693,540   | 684,542   | 667,414        | 628,279         | 623,703   | 614,973          | 18,1                   | 322               |
| V2V3    | 801,072     | 253/255             | 37/17        | 38/25        | 38/32        | 716,385    | 715,424   | 710,670   | 673,719        | 647,648         | 641,088   | 624,939          | 22,0                   | 380               |
| V3V4    | 668,509     | 259/254             | 34/19        | 38/27        | 38/33        | 575,366    | 574,457   | 569,210   | 552,435        | 552,012         | 496,112   | 488,560          | 26,9                   | 409               |
| V4V5    | 1,674,525   | 253/249             | 35/15        | 38/23        | 38/30        | 1,491,565  | 1,490,588 | 616,615   | 614,176        | 613,575         | 484,693   | 477,043          | 71,5                   | 373               |
| V5V7    | 881,612     | 250/251             | 38/16        | 38/24        | 38/30        | 796,138    | 794,606   | 787,603   | 775,057        | 768,817         | 768,676   | 766,525          | 13,1                   | 369               |
| V7V9    | 749,534     | 255/249             | 37/17        | 38/25        | 38/32        | 673,733    | 672,883   | 668,883   | 663,163        | 660,085         | 655,224   | 634,974          | 15,3                   | 377               |
| Total   | 5,526,176   |                     |              |              |              | 4,947,651  | 4,941,498 | 4,037,523 | 3,945,964      | 3,870,416       | 3,669,496 | 3,607,014        |                        |                   |

**Supplementary Table 3: Reads generated per amplicon-specific dataset.** Metrics on the raw read data and the number of reads retained after each pipeline step are indicated. Only urine sample libraries are considered. Q-score (Q) percentiles are based on the position defined by the last base of the median read. Non-chimeras I and II refers, respectively, to the *de novo* chimera-filtering step within DADA2 and to the *reference-based* chimera-filtering step with VSEARCH. F, forward reads; R, reverse reads; Q-filtered, reads retained after quality-filtering.



| <b>Taxonomic rank</b> | <b>Spearman <math>\rho</math></b> | <b>P-value</b> |
|-----------------------|-----------------------------------|----------------|
| Phylum                | 0,65                              | 0,16           |
| Class                 | 0,65                              | 0,16           |
| Order                 | -0,41                             | 0,42           |
| Family                | -0,26                             | 0,62           |
| Genus                 | -0,26                             | 0,66           |
| Species               | -0,58                             | 0,23           |

**Supplementary Table 4: Spearman correlation between taxonomic richness and the median ASV length per 16S rRNA amplicon-specific dataset.**

| Genus                              | Average RA (%) | Presence in urine        | Presence in humans  |
|------------------------------------|----------------|--------------------------|---------------------|
| <i>Comamonas</i>                   | 2,86           | Liu et al., 2020         | -                   |
| <i>Herbaspirillum</i>              | 0,50           | Wu et al., 2018          | -                   |
| <i>Chryseobacterium</i>            | 0,27           | Zhang et al., 2021       | -                   |
| <i>Ezakiella</i>                   | 0,22           | Qin et al., 2021         | -                   |
| <i>Facklamia</i>                   | 0,08           | Mostafa et al., 2019     | -                   |
| <i>Mycoplasma</i>                  | 0,04           | Smolec et al., 2021      | -                   |
| <i>Oribacterium</i>                | 0,01           | No                       | Sizova et al., 2014 |
| <i>Salipaludibacillus</i>          | <0,01          | No                       | No                  |
| <i>Chromohalobacter</i>            | <0,01          | No                       | No                  |
| <i>Tepidimonas</i>                 | <0,01          | Richter et al., 2022     | -                   |
| <i>Clostridium_sensu_stricto_1</i> | <0,01          | Mansour et al., 2020     | -                   |
| <i>Arcanobacterium</i>             | <0,01          | Ben Khedher et al., 2021 | -                   |
| <i>Lactococcus</i>                 | <0,01          | Newby and Ramesh, 2014   | -                   |
| <i>Jeotgalibaca</i>                | <0,001         | No                       | Ni et al., 2020     |
| <i>Alkalibacterium</i>             | <0,001         | No                       | No                  |
| Sum                                | 3,99           | -                        | -                   |

**Supplementary Table 5: List of genera detected exclusively in the V1V2 dataset.** The average relative abundance (RA) over all samples is shown for each genus. References on the presence of these genera in urine samples or humans are provided.

## 2. Supplementary References

- Ben Khedher, M., Lo, C. I., Diop, K., Morand, A., Armstrong, N., Raoult, D., et al. (2021). Taxonogenomics description of *Arcanobacterium urinimassiliense* sp. nov., a new bacterial species isolated from urine sample. *New Microbes New Infect.* 41, 100854. doi:10.1016/j.nmni.2021.100854.
- Liu, F., Ling, Z., Tang, C., Yi, F., and Chen, Y. Q. (2020). Moderation effects of food intake on the relationship between urinary microbiota and urinary interleukin-8 in female type 2 diabetic patients. *PeerJ* 8, e8481. doi:10.7717/peerj.8481.
- Mansour, B., Monyók, Á., Makra, N., Gajdács, M., Vadnay, I., Ligeti, B., et al. (2020). Bladder cancer-related microbiota: examining differences in urine and tissue samples. *Sci. Rep.* 10, 11042. doi:10.1038/s41598-020-67443-2.
- Mostafa, H. H., Taffner, S. M., Wang, J., Malek, A., Hardy, D. J., and Pecora, N. D. (2019). Genome Sequence of a *Facklamia hominis* Isolate from a Patient with Urosepsis. *Microbiol. Resour. Announc.* 8, e00100-19. doi:10.1128/MRA.00100-19.
- Newby, B., and Ramesh, K. K. (2014). Urinary Tract Infection in a Preterm Neonate Caused by *Lactococcus lactis*. *Can. J. Hosp. Pharm.* 67, 453–454. doi:10.4212/cjhp.v67i6.1409.
- Ni, Q., Ye, Z., Wang, Y., Chen, J., Zhang, W., Ma, C., et al. (2020). Gut Microbial Dysbiosis and Plasma Metabolic Profile in Individuals With Vitiligo. *Front. Microbiol.* 11, 592248. doi:10.3389/fmicb.2020.592248.
- Qin, J., Shi, X., Xu, J., Yuan, S., Zheng, B., Zhang, E., et al. (2021). Characterization of the Genitourinary Microbiome of 1,165 Middle-Aged and Elderly Healthy Individuals. *Front. Microbiol.* 12, 673969. doi:10.3389/fmicb.2021.673969.
- Richter, H. E., Carnes, M. U., Komesu, Y. M., Lukacz, E. S., Arya, L., Bradley, M., et al. (2022). Association between the urogenital microbiome and surgical treatment response in women undergoing midurethral sling operation for mixed urinary incontinence. *Am. J. Obstet. Gynecol.* 226, 93.e1-93.e15. doi:10.1016/j.ajog.2021.07.008.
- Sizova, M. V., Muller, P. A., Stancyk, D., Panikov, N. S., Mandalakis, M., Hazen, A., et al. (2014). *Oribacterium parvum* sp. nov. and *Oribacterium asaccharolyticum* sp. nov., obligately anaerobic bacteria from the human oral cavity, and emended description of the genus *Oribacterium*. *Int. J. Syst. Evol. Microbiol.* 64, 2642–2649. doi:10.1099/ijs.0.060988-0.
- Smolec, D., Ekiel, A., Kłuciński, P., and Kawecki, J. (2021). Occurrence of urogenital mycoplasmas in men with the common genitourinary diseases. *Braz. J. Microbiol. Publ. Braz. Soc. Microbiol.* 52, 2013–2019. doi:10.1007/s42770-021-00620-1.
- Wu, P., Zhang, G., Zhao, J., Chen, J., Chen, Y., Huang, W., et al. (2018). Profiling the Urinary Microbiota in Male Patients With Bladder Cancer in China. *Front. Cell. Infect. Microbiol.* 8, 167. doi:10.3389/fcimb.2018.00167.
- Zhang, Y., Li, D., Yang, Y., Su, J., Xu, X., Wang, M., et al. (2021). Clinical and molecular characteristics of *Chryseobacterium indologenes* isolates at a teaching hospital in Shanghai, China. *Ann. Transl. Med.* 9, 668. doi:10.21037/atm-21-933.
